# Supplementary material for: Comprehensive analysis of the landscape characteristics of m6A regulators in acute myeloid leukemia
Source: Research Square preprint supplement (doi:10.21203/rs.3.rs-1511744/v1), 2022-04-12
Supplement: Supplementary file 1 [file 1f08dd5c97ce59c455154054.xlsx]

## Sheet: Sheet1
		Primer名称	引物序列（5'to3'）
		METTL14-F(homo）	TGGACCTTGGAAGAGTGTGTT
		METTL14-R(homo）	GTGCTACGCTTCACAGTTCC
		ZC3H13-F(homo）	AGATGACGAGTCCAAGTTAGATGA
		ZC3H13-R(homo）	GGCATAAGACCAGACCAATCC
		RBM15-F(homo）	GCAGTCCAGAATTGAGCAGTAG
		RBM15-R(homo）	TACCTCGTCTGTCTCTGATTGG
		YTHDC2-F(homo）	AATCTCCATCTCCAGCATTACAC
		YTHDC2-R(homo）	AGAAGGACTAGCACAAGGACTT
